1       **QTG-Finder: a machine-learning based algorithm to prioritize causal**  
2                                                           **genes of quantitative trait loci**

3

4       **Fan Lin, Jue Fan, Seung Y. Rhee\***

5       Department of Plant Biology, Carnegie Institution for Science, Stanford, California 94305, USA

6       Contact: [srhee@carnegiescience.edu](mailto:srhee@carnegiescience.edu)

7       Phone: (650) 739-4251

8

9

10       **Author Contributions**

11       Conceptualization, S.Y.R.; Methodology, J.F., F.L., and S.Y.R.; Investigation, F.L. and J.F.; Formal  
12       Analysis, F.L. and J.F.; Writing–Original Draft, F.L.; Writing–Review & Editing, F.L., S.Y.R., and J.F.;  
13       Funding Acquisition, S.Y.R.; Resources, S.Y.R.; Supervision, S.Y.R.

14

15 **Abstract**

16 Linkage mapping is one of the most commonly used methods to identify genetic loci that determine a trait.  
17 However, the loci identified by linkage mapping may contain hundreds of candidate genes and require a  
18 time-consuming and labor-intensive fine mapping process to find the causal gene controlling the trait. With  
19 the availability of a rich assortment of genomic and functional genomic data, it is possible to develop a  
20 computational method to facilitate faster identification of causal genes. We developed QTG-Finder, a  
21 machine learning based algorithm to prioritize causal genes by ranking genes within a quantitative trait  
22 locus (QTL). Two predictive models were trained separately based on known causal genes in Arabidopsis  
23 and rice. With an independent validation analysis, we demonstrate the models can correctly prioritize about  
24 65% and 60% of Arabidopsis and rice causal genes when the top 20% ranked genes were considered. The  
25 models can prioritize different types of traits though at different efficiency. We also identified several  
26 important features of causal genes including paralog copy number, being a transporter, being a transcription  
27 factor, and containing SNPs that cause premature stop codon. This work lays the foundation for  
28 systematically understanding characteristics of causal genes and establishes a pipeline to predict causal  
29 genes based on public data.

30

31 **One sentence summary:** We systematically analyzed the genomic characteristics of causal genes in QTLs  
32 and developed a novel computational tool to prioritize causal genes.

33 **Keywords:** Arabidopsis, causal gene, machine-learning algorithm, candidates, quantitative trait loci, rice

## 34 **Introduction**

35 As the world's population expands, food security faces a major challenge in the near future. By 2050,  
36 world population is projected to grow by 34%, which will require a 70% increase of global food production  
37 to meet the demand (FAO 2009). To catch up with the growing global food demand, it is important to  
38 improve the efficiency of arable land usage by developing better crops.

39 Many agriculturally and medically important traits are quantitative and controlled by multiple genetic  
40 loci. Examples include plant height, grain yield, and flowering time in plants and common disorders such  
41 as cancer, diabetes, and hypertension in humans. The variation in quantitative traits allows organisms to  
42 adapt to various environments (Baxter *et al.* 2010; Leinonen *et al.* 2013). Quantitative traits are determined  
43 by a combination of genetic complexity and environmental factors (Mackay 2001). The genetic complexity  
44 of quantitative traits comes from the involvement of multiple quantitative trait loci (QTL) and the non-  
45 additive interactions among them (Carlborg and Haley 2004; Mackay 2014). To better understand the  
46 evolutionary forces and molecular mechanisms that shape the genetic architectures of adaptive traits, we  
47 need to identify all the causal genes that contribute to most of the phenotypic variation of the traits and  
48 elucidate the molecular mechanisms of their actions. Achieving this goal will facilitate rational engineering  
49 of plant traits and more accurate prediction of the effects of the modifications on the engineered plant.

50 QTL linkage mapping and genome wide association study (GWAS) are two common approaches used  
51 to identify QTLs, each with its own strengths and limitations. Both mapping approaches are based on the  
52 co-segregation of a trait and genetic variants in a population. The population for linkage mapping is usually  
53 the progeny of parental plants that differ in a trait, such as an F2 population or recombinant inbred lines  
54 (Bergelson and Roux 2010). GWAS mapping uses a natural population that has a heritable variation of a  
55 trait. Compared to GWAS, linkage mapping does not suffer from issues like rare alleles and population  
56 structure (Bergelson, 2010). For example, the most significant seed dormancy QTL *DOG1* identified by  
57 linkage mapping was not identified by GWAS, likely due to the rarity of the strong allele in the GWAS  
58 population (Bentsink *et al.* 2010; He 2014). Confounding population structure can cause a high false  
59 positive rate in GWAS, though some methods have been developed to ameliorate it (Price *et al.* 2010).  
60 However, efforts to correct it could result in a higher false negative rate (Brachi *et al.* 2010). Linkage  
61 mapping does not suffer from these issues, but it has a relatively lower mapping resolution and cannot  
62 identify QTLs of minor effects when the sample size is small (Martin and Orgogozo 2013; Otto and Jones  
63 2000; Wellenreuther and Hansson 2016; Xu 2003).

64 For QTLs identified by linkage mapping, finding causal genes underlying them is still a big  
65 bottleneck (Bergelson and Roux 2010). In a typical rice linkage mapping, the size of a QTL can range from  
66 200kb- 3Mb, which can harbor tens to hundreds of genes depending on the mapping population and gene  
67 density (Bargsten *et al.* 2014; Daware *et al.* 2017). Even in the post-genomic era where all the genes in the  
68 genome are uncovered, identifying QTL causal genes is not straightforward since many QTLs either  
69 contain no obvious candidate genes or too many genes relevant for the trait (Nuzhdin *et al.* 1999).

70 Therefore, despite the many QTLs that have been reported in plants, only a few have been studied at the  
71 molecular level.

72 Conventional fine mapping is a reliable but time-consuming and labor-intensive approach to narrow  
73 down the range of candidate genes in a QTL region. The basis of fine mapping is to create a population that  
74 has more recombination events within a QTL in order to identify a smaller genomic segment that co-  
75 segregates with the trait. However, the enormous time and labor required for creating and screening a  
76 population of progenies limits the usage of this method (Tuinstra *et al.* 1997). Depending on the frequency  
77 of recombination, thousands of progenies may need to be genotyped to get to a gene-scale resolution  
78 (Dinka *et al.* 2007). For example, 1,160 progenies were screened to identify the *Pi36* gene in rice and as  
79 many as 18,994 progenies were screened to identify the causal gene of Bph15 in rice (Liu *et al.* 2005; Yang  
80 *et al.* 2004). The high cost associated with genotyping and phenotyping makes it challenging to apply fine  
81 mapping to all QTLs.

82 Alternative approaches to refine the candidate list of causal genes include meta-analysis, joint  
83 linkage-association analysis, and other computational methods including machine-learning algorithms. The  
84 first two approaches require either the availability of many QTL studies on similar traits or an additional  
85 association mapping experiment (Buckler *et al.* 2009; Motte *et al.* 2014; Yin *et al.* 2017). Computational  
86 methods including machine-learning algorithms have been developed to prioritize disease associated genes  
87 and genetic variants in human (Hormozdiari *et al.* 2015; Kircher *et al.* 2014; Perez-Iratxeta *et al.* 2002;  
88 Ritchie *et al.* 2014). To distinguish disease-associated from non-associated variants, a variety of  
89 information has been used, including the effect of polymorphism (Gelfman *et al.* 2017; Kircher *et al.* 2014;  
90 Ng and Henikoff 2003), sequence conservation (Huang *et al.* 2017; Pollard *et al.* 2010), regulatory  
91 information (Deo *et al.* 2014), expression profile (Deo *et al.* 2014; Mordelet and Vert 2011), Gene  
92 Ontology (GO) (Mordelet and Vert 2011), KEGG pathway (Mordelet and Vert 2011), and publications  
93 (Perez-Iratxeta *et al.* 2002). In contrast, only two causal gene prioritization approaches are available for  
94 plants. One method was developed for GWAS in maize based on co-expression networks (Schaefer *et al.*  
95 2018). Another method was developed for linkage mapping based on biological process GOs (Bargsten *et al.*  
96 2014). To date, no machine-learning approaches using multiple data types have been developed to  
97 address this problem.

98 Here, we built a supervised learning algorithm to prioritize QTL causal genes using known causal  
99 genes in *Arabidopsis thaliana* (*Arabidopsis*) and *Oryza sativa* (rice) and a suite of publicly available  
100 genetic and genomic data. For each species, we trained a predictive model using features based on  
101 polymorphism data, function annotation, co-function network, and paralog copy number. By testing the  
102 models on an independent set of known causal genes, we demonstrated its efficiency in prioritizing causal  
103 genes.

## 104 **Materials and methods**

## 105 **Data sources and features used in QTG-Finder**

106 Twenty-eight features were extracted from published genome-scale data, which included  
107 polymorphism features, functional annotation features and other genomic and functional genomic features.

108 Arabidopsis polymorphism data of 1,135 accessions was downloaded from 1001 Genomes Project  
109 (<https://1001genomes.org>) (Consortium 2016) and rice polymorphism data of 3,010 cultivars was  
110 downloaded from Rice SNP-Seek Database (<http://snp-seek.irri.org>) (Mansueto *et al.* 2017). We used  
111 SIFT4G (v 2.4) (Ng and Henikoff 2003) and SnpEff (v 4.3r) (Cingolani *et al.* 2012) to annotate the raw  
112 polymorphism data. The number of non-synonymous SNP as annotated by SIFT4G was normalized to  
113 protein length and used as a numeric feature (normalized\_nonsyn\_SNP). Non-synonymous SNPs at  
114 conserved protein sequences were predicted to cause deleterious amino acid changes by SIFT4G. The  
115 presence of deleterious non-synonymous SNPs in a gene was used as a binary feature  
116 (is\_nonsyn\_deleterious). If a gene contained any deleterious non-synonymous SNPs, the  
117 “is\_nonsyn\_deleterious” feature was set to 1, otherwise it was set to 0. Other binary polymorphism features  
118 such as “is\_start\_lost” (start codon lost) and “is\_start\_gained” (start codon gained) were extracted from  
119 SnpEff annotations in the same way. For “is\_SNP\_cis”, the Position Weight Matrices of cis-elements were  
120 downloaded from CIS-BP database (Build 1.02) (Weirauch *et al.* 2014) and mapped to 1kb upstream of all  
121 genes in the genome using FIMO (v 4.12.0) (Grant *et al.* 2011). The cis-elements with a matching score  
122 above 55 were imported into SnpEff library to annotate the SNPs. This matching score cutoff was  
123 determined by a cross-validation as described later.

124 Functional annotation features were binary features based on GO (Gotz *et al.* 2008; Jones *et al.* 2014)  
125 and Plant Metabolic Network (PMN) (Schlapfer *et al.* 2017). Arabidopsis and rice genes were annotated by  
126 Blast2GO (BLAST+ 2.2.29) and InterProScan (v 5.3-46.0). The molecular function GOs were then  
127 converted to high-level functional groups such as transcription factor, receptor, kinase, transporter, and  
128 enzyme to mitigate the effect of some inaccurate annotations (Jones *et al.* 2007). Genes annotated as  
129 enzymes were further classified into 13 PMN metabolic domains such as carbohydrate metabolism and  
130 nucleotide metabolism (Schlapfer *et al.* 2017). Unclassified genes in PMN were classified as  
131 “is\_other\_metabolism”. Genes annotated as enzymes by GO but not present in PMN databases are enzymes  
132 involved in macromolecule metabolic process or enzymes that don’t have a specific function assigned.  
133 Since a majority of them is involved in macromolecule metabolic process, we named this group as  
134 “is\_macromolecule\_metabolism”.

135 Co-functional networks of Arabidopsis and rice were retrieved from AraNet and RiceNet (Lee *et al.*  
136 2010; Lee *et al.* 2011). The sum of all the edge weights of a gene was used as the “network\_weight”  
137 feature.

138 Paralog copy number (paralog\_copy\_number) and essential gene prediction (is\_essential\_gene) were  
139 taken from a previous publication (Lloyd *et al.* 2015).

## 140 **Arabidopsis and rice causal genes used for training and independent validation**

141 For model training and cross-validation, curated causal genes from Martin and Orgogozo were used as

142 positives for algorithm training (Martin and Orgogozo 2013). In total, 60 Arabidopsis and 45 rice causal  
143 genes were used as the initial training set. For literature validation, we performed a further literature  
144 curation and found eleven Arabidopsis and ten rice causal genes, which were not included in the Martin  
145 and Orgogozo list (Supplementary Methods).

#### 146 **Algorithm training and parameter optimization**

147 The QTG-Finder algorithm was developed in Python (v 3.6) with the ‘sklearn’ package (v 0.19.0)  
148 (Pedregosa *et al.* 2011). We developed an extended 5-fold cross-validation framework (Fig. 1a) to evaluate  
149 training performance and optimize model parameters.

150 For the 5-fold cross validation, curated causal genes were used as positives and the other genes from  
151 the genome were used as negatives. The positives were randomly split into training and testing positives in  
152 a 4:1 ratio. Training and testing positives were combined with different sets of negative genes that were  
153 randomly selected from the rest of the genome. To increase the combination of positives and negatives, we  
154 re-split the positives 50 times randomly and selected negatives 50 times. This number of iterations ensured  
155 greater than 99% probability that every positive sample co-occurred with every negative at least once in the  
156 training or testing set during the cross-validation process. The probability of co-occurrence was calculated  
157 as Equation 1.  $P_{co}$  is the probability of co-occurrence of a positive and a negative in a testing or training set.  
158  $N$  is the total number of negative samples.  $n$  is the number of negative samples selected as testing or  
159 training samples.  $R$  is the number of iterations used to re-split the positive set.  $C$  is the number of cross-  
160 validation folds that contains a positive sample.  $C$  was set to 4 for the training set and set to 1 for the testing  
161 test.  $S$  is the number of iterations to randomly select the negative set.

$$P_{co} = 1 - \left[ \prod_{i=0}^n \left( 1 - \frac{1}{N-i} \right) \right]^{R*C*S} \quad (1)$$

162 We tested different classifiers and parameters and optimized the model based on Area Under the Curve  
163 of the Receiver Operating Characteristic (AUC-ROC). The average AUC-ROC from all iterations was used  
164 to evaluate training performance. The three classifiers we tested were Random Forest, naïve Bayes, and  
165 Support Vector Machines (Cortes and Vapnik 1995; Tin Kam 1998; Zhang 2004)(Supplementary Fig. S1).  
166 For Random Forest, we tuned the number of trees and the maximum number of features for each tree based  
167 on AUC-ROC (Supplementary Fig. S2). We used 100 trees and a max\_feature of 9 for Random Forest. For  
168 Support Vector Machines, RBF kernel was used and the C parameter was tuned. Random Forest was  
169 chosen for further analysis since its performance was slightly better than the other two classifiers. The ratio  
170 of positives and negatives in training data was also tuned to maximize cross-validation AUC-ROC  
171 (Supplementary Fig. S3). The best performing positives:negatives ratio was 1:20 for Arabidopsis and 1:5  
172 for rice. For testing, a positives:negatives ratio of 1:200 was used since it is close to the average ratio of  
173 causal and non-causal genes in real QTLs.

174 The source code for cross-validation and any other analyses below are available at  
175 [https://github.com/carnegie/QTG\\_Finder](https://github.com/carnegie/QTG_Finder)  
176

## 177 **Feature importance analysis**

178 We implemented a leave-one-out analysis to evaluate feature importance. This method was based on the  
179 change of AUC-ROC ( $\Delta$ AUC-ROC) when leaving out one feature from the models. The same cross-  
180 validation framework was used for this analysis. For each iteration, we calculated AUC-ROC on the  
181 original and the leave-one-out models developed with the same training and testing datasets. The  $\Delta$ AUC-  
182 ROC was calculated by subtracting the leave-one-out AUC-ROC from the original AUC-ROC. With the  
183 results from all iterations, we calculated the average  $\Delta$ AUC-ROC for each feature.

## 184 **Independent literature validation**

185 For validation, we applied the models to an independent set of causal genes that were curated from  
186 recent literature and not used for cross-validation. The models were trained by known causal genes from  
187 the initial list and negatives were randomly selected from the rest of the genome. Model training was  
188 repeated 5,000 times by resampling training negatives from the genome. With 5,000 iterations, there was  
189 >99% probability that each gene in the genome was selected at least once based on simulation. We applied  
190 the models to each of the independent causal gene and all other genes located within the QTL. All genes  
191 within the QTL were ranked based on the frequency of being predicted as a causal gene.

192 We calculated the probability of correctly prioritizing at least  $K$  causal genes when applying the  
193 models to a total of  $N$  QTLs with Equation 2.  $p$  is the probability to correctly prioritize a causal gene of a  
194 single QTL at a certain threshold.  $x$  is the number of causal genes being correctly prioritized.

$$195 P(x \geq K) = \sum_{x=K}^N \binom{N}{x} p^x (1-p)^{N-x} \quad (2)$$

## 196 **Trait category analysis**

197 The trait category analysis was performed in a similar way as the independent literature validation except  
198 using different training and testing sets. Each curated causal gene was tested once. For each round, one  
199 curated causal gene was removed from the training set. Then the model was trained and applied to rank the  
200 known causal gene and 200 flanking genes.

201

## 202 **Results**

### 203 **QTG-Finder: a machine-learning algorithm to prioritize causal genes**

204 We developed the QTG-Finder algorithm to find causal genes from QTL data and generated two  
205 predictive models in Arabidopsis and rice with the algorithm. These two species were selected for model  
206 training since they have the largest number of QTL causal genes (QTGs) that have been discovered by fine  
207 mapping and map-based cloning in plants (Martin and Orgogozo 2013). For model training, we selected 60  
208 Arabidopsis and 45 rice causal genes as a positive set (Martin and Orgogozo, 2013, Supplementary Tables  
209 S1 and S2). The negative set was a subset of genes randomly selected from the rest of the genome. To train  
210 the models, we used 28 Arabidopsis features and 27 rice features, including polymorphisms, functional  
211 categories of genes, function interference from co-function networks, gene essentiality, and paralog copy  
212 number (Supplementary Tables S3, S4 and S5). These features were generally independent from each other

213 (most have a Pearson's correlation coefficient  $<0.2$ ) (Supplementary Fig. S4).

214 We optimized the models with an extended cross-validation framework (Fig. 1a). In addition to a  
215 typical 5-fold cross-validation (Kuhn and Johnson 2013), iterations were applied to randomly select genes  
216 from the negative set and re-split the positive set in order to maximize the combinations of positives and  
217 negatives in the training and testing sets (See method).

218 With this framework, we evaluated the training performance with Area Under the Curve of Receiver  
219 Operating Characteristic (AUC-ROC) and optimized parameters. To find the optimal parameters, we  
220 compared the AUC-ROC of different machine-learning classifiers, modeling parameters, and the ratio of  
221 positive:negative genes in the training set (Supplementary Fig. S2, S3, and S4). Random Forest was  
222 selected as the classifier since it was less prone to over-fitting and performed better than the other  
223 classifiers tested (Supplementary Fig. S1). After optimization, AUC-ROC for the Arabidopsis and rice  
224 models were 0.86 and 0.73, respectively (Fig. 1b).

225 Since the positive training set used was relatively small, we also evaluated the relationship between  
226 training performance and size of the training set. The AUC-ROC increased as a larger training set was  
227 used. Interestingly, maximum gain in the AUC-ROC was achieved with 20 causal genes (Supplementary  
228 Fig. S5).

### 229 **Important features for predicting causal genes**

230 With the optimized models, we wanted to know which features were important for causal gene  
231 prediction. Since Random Forest uses features and their interactions for classification (Touw *et al.* 2013),  
232 the importance of a feature cannot be measured by simple enrichment or depletion of a single feature in  
233 causal genes. Therefore, we evaluated feature importance based on the change of ROC-AUC ( $\Delta$ ROC-AUC)  
234 when excluding a feature from the model (Lloyd *et al.* 2015). When an important feature is excluded from  
235 the model, the ROC-AUC should decrease.

236 Here, we highlighted the six most important features out of a total of 28 features. The six most  
237 important features for Arabidopsis were paralog copy number, transporter, the number of non-synonymous  
238 SNPs normalized to protein length (normalized\_nonsyn\_SNP), receptor, transcription factor, and SNPs  
239 causing premature stop codon (is\_stop\_gained) (Fig. 2a). The six most important features for rice were  
240 paralog copy number, macromolecule metabolism, network weight sum, transcription factor, transporter,  
241 and SNPs causing premature stop codon. Four out of the six most important features were consistent  
242 between Arabidopsis and rice models, which were paralog copy number, transporter, transcription factor,  
243 and SNPs causing premature stop codon.

244 For the six most important features in Arabidopsis and rice, we examined their ratio in known causal  
245 genes versus randomly selected genes in the genome (Fig. 2b). Compared to other genes in the genome, the  
246 causal genes tended to have more paralogs, higher frequency of being a transporter or a transcription factor,  
247 and higher frequency of containing SNPs that cause premature stop codons in both species.

248 The rest of the features contributed less to, but did not impair, model performance to a large degree  
249 ( $\Delta$ ROC-AUC  $< 0.02$ ). Since there was no strong evidence that they impair prediction, we did not remove



250 them from the models for further analysis.

### 251 **Validating QTG-Finder by ranking an independent set of QTL genes**

252 To assess the predictability of QTG-Finder models, we searched the literature for a separate set of  
253 known causal genes from the initial training set. We found eleven Arabidopsis and ten rice genes that are  
254 likely causal genes underlying QTLs when interpreting linkage mapping with additional evidence such as  
255 functional complementation, fine mapping, joint linkage-association analysis or genetic analyses  
256 (Supplementary Table S6). These causal genes were not used for model training or cross-validation.

257 To examine model performance, we applied the QTG-Finder models to this new set of causal genes.  
258 For each known causal gene, we ranked all genes in the QTL region based on the frequency of being  
259 predicted as a causal gene from 5,000 iterations. Since the number of genes in a QTL region varies, we  
260 used a gene's rank percentile for evaluation. The rank percentile of a gene indicates the percentage of QTL  
261 genes that had higher ranks than the gene of interest.

262 Based on the rank of these known causal genes, we evaluated model performance at different cutoffs.  
263 We calculated the percentage of known causal genes included in the top 5%, 10%, and 20% of the  
264 prioritized genes within a QTL (Fig. 3a). The top 20% of the ranked genes included seven Arabidopsis  
265 (~64%) and six rice (~60%) causal genes. With a more stringent cutoff of 5%, four Arabidopsis (~27%)  
266 and three rice (~30%) causal genes were prioritized.

267 Most linkage mapping studies identify multiple QTLs. We therefore calculated a theoretical model  
268 performance on identifying causal genes from multiple QTLs simultaneously, which we defined as the  
269 probability of identifying at least X% of all causal genes when applying the model to all QTLs of a trait  
270 (Fig. 3b and c). For example, assuming there were five QTLs of a trait identified by a linkage mapping  
271 study and each QTL contained one causal gene. For the Arabidopsis model, the probability of identifying at  
272 least one causal gene would be 99% when the top 20% genes of all QTLs were tested experimentally. The  
273 probability of identifying all five causal genes would be 10% when the top 20% cutoff was used. We  
274 further compared the performance of all three cutoffs, top 20%, top 10%, and top 5%. The probability of  
275 identifying at least one out of five causal genes would be no less than 80% for all three cutoffs. The  
276 probability to correctly prioritize at least four out of five causal genes would be 40% (for top 20%), 14%  
277 (for top 10%), and 2% (for top 5%). Therefore, a less stringent cutoff (top 20%) performs much better than  
278 a more stringent cutoff if one is interested in finding most of the causal genes or causal genes of a particular  
279 QTL. However, if the goal is to identify any causal gene, then screening the top 5% of all QTLs may be a  
280 more strategic approach since fewer candidate genes need to be tested experimentally.

### 281 **Trait type preference of QTG-Finder models**

282 Since the training set included genes for different types of traits at an imbalanced ratio, we wanted to  
283 know how QTG-Finder models would work for each type of traits (Fig. 4a). The independent validation  
284 described above was based on causal genes related to plant development and disease resistance  
285 (Supplementary Table S6). However, this validation set was not large enough for a systematic analysis and  
286 did not have any abiotic-stress-related causal genes. Therefore, we performed a rank analysis for different

287 trait categories using the known causal genes from the initial training set (60 for Arabidopsis and 45 for  
288 rice). For this rank analysis, each causal gene was taken out from the training set once and used for a rank  
289 test. The single causal gene and its 200 neighboring genes in the genome were used as a testing set. We  
290 applied the models to each testing set to obtain the rank for each causal gene. Then we calculated the  
291 average rank for the causal genes in the four trait categories: development, abiotic stress, biotic stress and  
292 “other”. The “other” category included traits in seed hull color, oil composition, necrosis, etc.

293 Performance of the models was not the same for different trait categories. Both abiotic and biotic stress  
294 traits had better performance than developmental traits (Fig. 4b). In addition, the Arabidopsis model  
295 performed slightly better than the rice model for all trait categories. This trait category analysis can guide  
296 users to determine rank cutoffs when applying models to different types of traits.

297

## 298 **Discussion**

299 Linkage mapping is a useful tool to identify the genomic regions responsible for many agriculturally and  
300 medically important traits. However, it is not straightforward to identify the genes that cause the trait  
301 variation from these genome regions. The discovery of causal genes still requires time-consuming and  
302 labor-intensive fine mapping. In this study, we developed a machine-learning algorithm to reduce the  
303 number of candidates to be tested experimentally in order to accelerate the discovery of causal genes.

### 304 **A machine-learning algorithm to prioritize QTL causal genes**

305 Several causal variant or gene prioritization methods have been developed for human data but not many  
306 in plants (Bargsten *et al.* 2014; Jagadeesh *et al.* 2016; Kircher *et al.* 2014; Schaefer *et al.* 2018). Most  
307 prioritization methods have been developed for GWAS mapping in human, an organism where linkage  
308 mapping cannot be performed. However, linkage mapping can capture rare alleles and has been broadly  
309 used to study quantitative traits of livestock, crops, and model organisms. A causal gene prioritization is  
310 especially helpful for large QTLs identified by linkage mapping, which can constitute tens to hundreds of  
311 genes. One method has been developed in rice to prioritize causal genes for linkage mapping (Bargsten  
312 *et al.* 2014). This method is based on the hypothesis that causal genes from multiple QTLs of the same trait  
313 are more likely to have the same biological process GO terms, and therefore genes with overrepresented  
314 biological process GOs were prioritized as causal genes. However, this method gives no predictions for  
315 ~15% of traits and lack an unbiased performance evaluation since the same set of causal genes was used to  
316 determine cutoff and evaluate performance.

317 In this study, we built a supervised learning algorithm using multiple features and validated its efficacy  
318 with an independent dataset from the literature. The models could accelerate the discovery of causal genes  
319 by ranking all the genes in a QTL region and prioritizing the top 5%, 10%, or 20% genes, which are most  
320 likely to contain the causal gene, for experimental testing. Based on an assessment using independent data  
321 in the literature, we calculated the performance when applying the models to all QTLs of a trait and  
322 compared three cutoffs (top 5%, 10%, and 20%). The less stringent cutoff (top 20%) had a higher chance to  
323 find more causal genes (Fig. 3b and c) but yielded more candidates that needed to be tested by experiments.

324 The more stringent cutoff (top 5%) had a lower chance to find all causal genes but yielded a smaller set of  
325 candidates to test. The probability for the models to find at least one causal gene is high for all three  
326 cutoffs. If the goal were to find one or more causal genes for functional studies and the particular QTL  
327 regions did not matter, the 5% cutoff would be more efficient. If the goal were to discover all causal genes  
328 and understand the genetic architecture of a trait, the 20% cutoff would be better. Similarly, if a particular  
329 QTL were of interest for discovering the underlying causal gene, the 20% cutoff would be better.

330 There are several conceptual and practical advantages of QTG-Finder algorithm. First, this algorithm  
331 combines multiple types of publically available data including polymorphisms, function annotations, co-  
332 function network and other genomic data, which have not been applied to prioritize causal genes from  
333 linkage mapping studies. Second, models were trained on causal genes from various traits and can be  
334 applied to several types of traditional traits, though the prioritization efficiency was not equivalent. Third,  
335 validation from the literature provides guidance on what proportion of genes to prioritize in practice rather  
336 than arbitrarily selecting a threshold. Fourth, the models treat each QTL independently and have the  
337 flexibility to prioritize a specific QTL of interest.

338 Two limitations of this study are the small number of known causal genes in plants and the impurity of  
339 negative set used for model training. We used 60 Arabidopsis and 45 rice causal genes that have been  
340 verified by map-based-cloning as a positive dataset. Even though they are of high quality, this positive  
341 dataset may not be large enough to represent all the features of causal genes. There could still be other  
342 important features of causal genes that we were not able to capture with this small dataset. The negative set  
343 was composed of genes randomly selected from the rest of the genome. Though we excluded known causal  
344 genes, there could still be some uncharacterized causal genes. As a result of these limitations, 20% cutoff  
345 will still yield ~100 candidates for large QTLs, which is challenging for genetic characterization unless at  
346 least a medium-throughput phenotyping method is available. Fortunately, plant science is entering an era of  
347 high-throughput phenotyping with advances in automation, computation and sensor technology (Araus *et*  
348 *al.* 2018; Fahlgren *et al.* 2015). Our study establishes an extendable framework that can be easily updated  
349 with new training datasets and features. As more causal genes are uncovered, the new data can be easily  
350 incorporated to improve the models.

### 351 **Important features for predicting QTL causal genes**

352 Many causal genes were repeatedly found to cause phenotypic variation of similar traits, which is also  
353 known as genetic hotspots of phenotypic variation or gene reuse (Martin and Orgogozo 2013). By  
354 examining 1,008 causative alleles in animals, plants, and yeasts, Martin and Orgogozo found *de novo*  
355 mutations to occur repeatedly at certain genes or orthologous loci and causing similar phenotypic variations  
356 either among lineages or within a single lineage. The prevalence of gene reuse suggests that causal genes  
357 are likely to have some genetic and genomic characteristics that allow them to be repeatedly used for  
358 phenotypic variation. The mechanism for gene reuse is not clear but it may be influenced by factors such as  
359 the availability of standing genetic variation, mutation rate, pleiotropic constraint, and epistatic interactions  
360 of a gene (Conte *et al.* 2015; Conte *et al.* 2012).

361 While many QTL causal genes have been cloned, their features have not been systematically examined  
362 before. Instead of evaluating each feature individually, we trained Random Forest models and evaluated  
363 feature importance for all features by adopting the leave-one-out strategy. Several of the most important  
364 features were consistent between Arabidopsis and rice models: containing SNPs that cause a premature  
365 stop codon, paralog copy number, being a transporter, and being a transcription factor.

366 We extracted polymorphism features from re-sequencing data, which provide more information about  
367 the existence of standing genetic variation in the species than the polymorphism data used for linkage  
368 mapping, which typically comes from two parental lines. DNA polymorphisms such as nonsense SNPs,  
369 deleterious non-synonymous SNPs, SNPs at cis-regulatory elements, and SNPs at splice junctions have  
370 been used as features to classify causal and non-causal variants of human diseases (Jagadeesh *et al.* 2016;  
371 Kircher *et al.* 2014). These SNPs can directly affect the function or expression of a gene and therefore are  
372 more likely to be causal than the rest of the SNPs. Our results indicate Arabidopsis and rice causal genes  
373 were more likely to carry a SNP that causes premature stop codon (nonsense SNP) than an average gene in  
374 the genome. We also found Arabidopsis causal genes were more likely to have more non-synonymous  
375 SNPs than an average gene in the genome. Besides the high impact SNPs in coding regions, we also  
376 examined polymorphisms in non-coding regions since about 90% of human trait/disease-associated SNPs  
377 are located outside of coding regions (Hindorff *et al.* 2009). The SNPs at cis-regulatory elements did not  
378 show a high feature importance in our algorithm, although this might be due to limited exploration of non-  
379 coding sequences in plants. The CIS-BP database contains cis-elements of 44% of the transcription factors  
380 in Arabidopsis (Weirauch *et al.* 2014). Developing a more accurate and complete map of functional non-  
381 coding regions based on conserved noncoding sequences (Van de Velde *et al.* 2014) will potentially make  
382 non-coding polymorphism features more useful for prioritizing causal genes.

383 Paralogs contribute to the evolution of plant traits by providing functional divergence that gives plants  
384 the potential to adapt to complex environments (Panchy *et al.* 2016). Through evolution, genes involved in  
385 signal transduction and stress response have retained more paralogs while essential genes like DNA gyrase  
386 A have retained fewer paralogs (Lloyd *et al.* 2015; Panchy *et al.* 2016). By acquiring new functions or sub-  
387 functions, paralogs allow plants to sense and handle different environmental conditions in a more  
388 comprehensive and adjustable way. For example, the eight paralogous heavy metal ATPases (HMAs) in  
389 Arabidopsis are all involved in heavy metal transport but have different substrate preference, tissue  
390 expression patterns, and subcellular compartment locations (Takahashi *et al.* 2012). Three of them, HMA3,  
391 HMA4, HMA5, are known causal genes of QTLs identified by linkage mapping. The known causal genes  
392 we analyzed have more paralog copies than other genes in the genome. This may suggest that many plant  
393 causal genes are playing a role in providing more phenotypic tuning parameters to allow plants to adapt to  
394 complex environments.

395 Plant transporters are involved in nutrient uptake, response to abiotic stresses, pathogen resistance, and  
396 other plant-environment interactions (Conde *et al.* 2011; Doidy *et al.* 2012). Polymorphisms in transporters  
397 play an important role in local adaptation since many transporters are directly involved in environment

398 responses (Baxter *et al.* 2010; Turner *et al.* 2010). For example, in *Arabidopsis lyrata*, the polymorphisms  
399 most strongly associated with soil type are enriched in metal transporters (Turner *et al.* 2010). We observed  
400 a higher frequency of causal genes being transporters than the average gene in the genome. Causal  
401 transporters that contribute to trait variation may have a more important role in local adaptation than other  
402 transporters.

403 Transcription factors were enriched in causal genes not only in plants but also in other organisms  
404 (Martin and Orgogozo 2013). This enrichment may be due to an ascertainment bias since linkage mapping  
405 tends to identify genes with large effects (Martin and Orgogozo 2013). Since QTG-Finder focuses on  
406 prioritizing the causal genes identified by linkage mapping, this feature is useful in distinguishing them  
407 from other causal genes such as the medium-effect genes that can be detected by GWAS but not by linkage  
408 mapping.

409 Overall, QTG-Finder is a novel machine-learning pipeline to prioritize causal genes for QTLs  
410 identified by linkage mapping. We trained QTG-Finder models for *Arabidopsis* and rice based on known  
411 causal genes from each species, respectively. By utilizing information like polymorphisms, function  
412 annotations, co-function networks, and paralog copy numbers, the models can rank QTL genes to prioritize  
413 causal genes. Our independent literature validation demonstrates that the models can correctly prioritize  
414 about 65% of causal genes for *Arabidopsis* and 60% for rice when the top 20% of ranked QTL genes were  
415 considered. The algorithm is applicable to any traditional quantitative traits but the performance was  
416 different for each trait type. Since QTG-Finder is a machine-learning based pipeline, extending the training  
417 set and adding features can easily expand and improve the models. We envision that frameworks like QTG-  
418 Finder can accelerate the discovery of novel quantitative trait genes by reducing the number of candidate  
419 genes and efforts of experimental testing.

420

#### 421 **Acknowledgements**

422 We thank Dr. John Lloyd and Dr. Shin-Han Shiu for sharing the data of rice essential gene prediction. We  
423 thank Kevin Radja for testing the source code and giving useful comments.

#### 424 **Funding**

425 This work was supported by the United States Department of Energy's Biological and Environmental  
426 Research Program [DE-SC0008769, DE-SC0018277].

#### 427 **Conflict of interest**

428 The authors declare no conflict of interest.

429

430 **References**

- 431 Araus JL, Kefauver SC, Zaman-Allah M, Olsen MS, Cairns JE (2018) Translating High-Throughput  
432 Phenotyping into Genetic Gain Trends Plant Sci 23:451-466 doi:10.1016/j.tplants.2018.02.001
- 433 Bargsten JW, Nap JP, Sanchez-Perez GF, van Dijk AD (2014) Prioritization of candidate genes in QTL  
434 regions based on associations between traits and biological processes BMC Plant Biol 14:330  
435 doi:10.1186/s12870-014-0330-3
- 436 Baxter I, Brazelton JN, Yu D, Huang YS, Lahner B, Yakubova E, Li Y, Bergelson J et al. (2010) A Coastal  
437 Cline in Sodium Accumulation in *Arabidopsis thaliana* Is Driven by Natural Variation of the  
438 Sodium Transporter AtHKT1;1 PLoS Genet 6:e1001193 doi:10.1371/journal.pgen.1001193
- 439 Bentsink L, Hanson J, Hanhart CJ, Blankestijn-de Vries H, Coltrane C, Keizer P, El-Lithy M, Alonso-  
440 Blanco C et al. (2010) Natural variation for seed dormancy in *Arabidopsis* is regulated by additive  
441 genetic and molecular pathways Proc Natl Acad Sci U S A 107:4264-4269  
442 doi:10.1073/pnas.1000410107
- 443 Bergelson J, Roux F (2010) Towards identifying genes underlying ecologically relevant traits in  
444 *Arabidopsis thaliana* Nat Rev Genet 11:867-879 doi:10.1038/nrg2896
- 445 Brachi B, Faure N, Horton M, Flahauw E, Vazquez A, Nordborg M, Bergelson J, Cuguen J et al. (2010)  
446 Linkage and association mapping of *Arabidopsis thaliana* flowering time in nature PLoS Genet  
447 6:e1000940 doi:10.1371/journal.pgen.1000940
- 448 Buckler ES, Holland JB, Bradbury PJ, Acharya CB, Brown PJ, Browne C, Ersoz E, Flint-Garcia S et al.  
449 (2009) The Genetic Architecture of Maize Flowering Time Science 325:714-718  
450 doi:10.1126/science.1174276
- 451 Carlborg O, Haley CS (2004) Epistasis: too often neglected in complex trait studies? Nat Rev Genet 5:618-  
452 U614 doi:10.1038/nrg1407
- 453 Cingolani P, Platts A, Wang LL, Coon M, Nguyen T, Wang L, Land SJ, Lu XY et al. (2012) A program for  
454 annotating and predicting the effects of single nucleotide polymorphisms, SnpEff: SNPs in the  
455 genome of *Drosophila melanogaster* strain w(1118); iso-2; iso-3 Fly 6:80-92  
456 doi:10.4161/fly.19695
- 457 Conde A, Chaves MM, Geros H (2011) Membrane Transport, Sensing and Signaling in Plant Adaptation to  
458 Environmental Stress Plant Cell Physiol 52:1583-1602 doi:10.1093/pcp/pcr107
- 459 Consortium TG (2016) 1,135 Genomes Reveal the Global Pattern of Polymorphism in *Arabidopsis thaliana*  
460 Cell 166:481-491 doi:10.1016/j.cell.2016.05.063
- 461 Conte GL, Arnegard ME, Best J, Chan YF, Jones FC, Kingsley DM, Schluter D, Peichel CL (2015) Extent  
462 of QTL Reuse During Repeated Phenotypic Divergence of Sympatric Threespine Stickleback  
463 Genetics 201:1189-1200 doi:10.1534/genetics.115.182550
- 464 Conte GL, Arnegard ME, Peichel CL, Schluter D (2012) The probability of genetic parallelism and  
465 convergence in natural populations Proc Biol Sci 279:5039-5047 doi:10.1098/rspb.2012.2146
- 466 Cortes C, Vapnik V (1995) Support-vector networks Machine Learning 20:273-297  
467 doi:10.1007/BF00994018
- 468 Daware AV, Srivastava R, Singh AK, Parida SK, Tyagi AK (2017) Regional Association Analysis of  
469 MetaQTLs Delineates Candidate Grain Size Genes in Rice Front Plant Sci 8:807  
470 doi:10.3389/fpls.2017.00807

- 471 Deo RC, Musso G, Tasan M, Tang P, Poon A, Yuan C, Felix JF, Vasan RS et al. (2014) Prioritizing causal  
472 disease genes using unbiased genomic features *Genome Biol* 15:534 doi:10.1186/s13059-014-  
473 0534-8
- 474 Dinka SJ, Campbell MA, Demers T, Raizada MN (2007) Predicting the size of the progeny mapping  
475 population required to positionally clone a gene *Genetics* 176:2035-2054  
476 doi:10.1534/genetics.107.074377
- 477 Doidy J, Grace E, Kuhn C, Simon-Plas F, Casieri L, Wipf D (2012) Sugar transporters in plants and in their  
478 interactions with fungi *Trends Plant Sci* 17:413-422 doi:10.1016/j.tplants.2012.03.009
- 479 Fahlgren N, Gehan MA, Baxter I (2015) Lights, camera, action: high-throughput plant phenotyping is  
480 ready for a close-up *Curr Opin Plant Biol* 24:93-99 doi:10.1016/j.pbi.2015.02.006
- 481 FAO (2009) How to feed the world in 2050
- 482 Gelfman S, Wang Q, McSweeney KM, Ren Z, La Carpia F, Halvorsen M, Schoch K, Ratzon F et al. (2017)  
483 Annotating pathogenic non-coding variants in genic regions *Nat Commun* 8:236  
484 doi:10.1038/s41467-017-00141-2
- 485 Gotz S, Garcia-Gomez JM, Terol J, Williams TD, Nagaraj SH, Nueda MJ, Robles M, Talon M et al. (2008)  
486 High-throughput functional annotation and data mining with the Blast2GO suite *Nucleic Acids*  
487 *Res* 36:3420-3435 doi:10.1093/nar/gkn176
- 488 Grant CE, Bailey TL, Noble WS (2011) FIMO: scanning for occurrences of a given motif *Bioinformatics*  
489 27:1017-1018 doi:10.1093/bioinformatics/btr064
- 490 He H (2014) Environmental Regulation of Seed Performance. Dissertation. Wageningen University
- 491 Hindorff LA, Sethupathy P, Junkins HA, Ramos EM, Mehta JP, Collins FS, Manolio TA (2009) Potential  
492 etiologic and functional implications of genome-wide association loci for human diseases and  
493 traits *Proc Natl Acad Sci U S A* 106:9362-9367 doi:10.1073/pnas.0903103106
- 494 Hormozdiari F, Kichaev G, Yang WY, Pasaniuc B, Eskin E (2015) Identification of causal genes for  
495 complex traits *Bioinformatics* 31:206-213 doi:10.1093/bioinformatics/btv240
- 496 Huang YF, Gulko B, Siepel A (2017) Fast, scalable prediction of deleterious noncoding variants from  
497 functional and population genomic data *Nat Genet* 49:618-624 doi:10.1038/ng.3810
- 498 Jagadeesh KA, Wenger AM, Berger MJ, Guturu H, Stenson PD, Cooper DN, Bernstein JA, Bejerano G  
499 (2016) M-CAP eliminates a majority of variants of uncertain significance in clinical exomes at  
500 high sensitivity *Nat Genet* 48:1581-1586 doi:10.1038/ng.3703
- 501 Jones CE, Brown AL, Baumann U (2007) Estimating the annotation error rate of curated GO database  
502 sequence annotations *BMC Bioinform* 8:170 doi:10.1186/1471-2105-8-170
- 503 Jones P, Binns D, Chang HY, Fraser M, Li W, McAnulla C, McWilliam H, Maslen J et al. (2014)  
504 InterProScan 5: genome-scale protein function classification *Bioinformatics* 30:1236-1240  
505 doi:10.1093/bioinformatics/btu031
- 506 Kircher M, Witten DM, Jain P, O'Roak BJ, Cooper GM, Shendure J (2014) A general framework for  
507 estimating the relative pathogenicity of human genetic variants *Nat Genet* 46:310-315  
508 doi:10.1038/ng.2892

- 509 Kuhn M, Johnson K (2013) Applied Predictive Modeling. New York : Springer. doi:10.1007/978-1-4614-  
510 6849-3
- 511 Lee I, Ambaru B, Thakkar P, Marcotte EM, Rhee SY (2010) Rational association of genes with traits using  
512 a genome-scale gene network for *Arabidopsis thaliana* Nat Biotechnol 28:149-U114  
513 doi:10.1038/nbt.1603
- 514 Lee I, Seo YS, Coltrane D, Hwang S, Oh T, Marcotte EM, Ronald PC (2011) Genetic dissection of the  
515 biotic stress response using a genome-scale gene network for rice Proc Natl Acad Sci U S A  
516 108:18548-18553 doi:10.1073/pnas.1110384108
- 517 Leinonen PH, Remington DL, Leppala J, Savolainen O (2013) Genetic basis of local adaptation and  
518 flowering time variation in *Arabidopsis lyrata* Mol Ecol 22:709-723 doi:10.1111/j.1365-  
519 294X.2012.05678.x
- 520 Liu XQ, Wang L, Chen S, Lin F, Pan QH (2005) Genetic and physical mapping of *Pi36(t)*, a novel rice  
521 blast resistance gene located on rice chromosome 8 Mol Genet Genomics 274:394-401  
522 doi:10.1007/s00438-005-0032-5
- 523 Lloyd JP, Seddon AE, Moghe GD, Simenc MC, Shiu S-H (2015) Characteristics of Plant Essential Genes  
524 Allow for within- and between-Species Prediction of Lethal Mutant Phenotypes Plant Cell  
525 27:2133-2147 doi:10.1105/tpc.15.00051
- 526 Mackay TFC (2001) The genetic architecture of quantitative traits Annu Rev Genet 35:303-339 doi:DOI  
527 10.1146/annurev.genet.35.102401.090633
- 528 Mackay TFC (2014) Epistasis and Quantitative Traits: Using Model Organisms to Study Gene-Gene  
529 Interactions Nat Rev Genet 15:22-33 doi:10.1038/nrg3627
- 530 Mansueto L, Fuentes RR, Borja FN, Detras J, Abriol-Santos JM, Chebotarov D, Sanciangco M, Palis K et  
531 al. (2017) Rice SNP-seek database update: new SNPs, indels, and queries Nucleic Acids Res  
532 45:D1075-D1081 doi:10.1093/nar/gkw1135
- 533 Martin A, Orgogozo V (2013) The Loci of repeated evolution: a catalog of genetic hotspots of phenotypic  
534 variation Evolution 67:1235-1250 doi:10.1111/evo.12081
- 535 Mordelet F, Vert JP (2011) ProDiGe: Prioritization Of Disease Genes with multitask machine learning  
536 from positive and unlabeled examples BMC Bioinform 12:389 doi:10.1186/1471-2105-12-389
- 537 Motte H, Vercauteren A, Depuydt S, Landschoot S, Geelen D, Werbrouck S, Goormachtig S, Vuylsteke M  
538 et al. (2014) Combining linkage and association mapping identifies RECEPTOR-LIKE PROTEIN  
539 KINASE1 as an essential Arabidopsis shoot regeneration gene Proc Natl Acad Sci U S A  
540 111:8305-8310 doi:10.1073/pnas.1404978111
- 541 Ng PC, Henikoff S (2003) SIFT: predicting amino acid changes that affect protein function Nucleic Acids  
542 Res 31:3812-3814
- 543 Nuzhdin SV, Dilda CL, Mackay TF (1999) The genetic architecture of selection response. Inferences from  
544 fine-scale mapping of bristle number quantitative trait loci in *Drosophila melanogaster* Genetics  
545 153:1317-1331
- 546 Otto SP, Jones CD (2000) Detecting the undetected: Estimating the total number of loci underlying a  
547 quantitative trait Genetics 156:2093-2107



- 548 Panchy N, Lehti-Shiu M, Shiu SH (2016) Evolution of Gene Duplication in Plants *Plant Physiol* 171:2294-  
549 2316 doi:10.1104/pp.16.00523
- 550 Pedregosa F, Varoquaux G, Gramfort A, Michel V, Thirion B, Grisel O, Blondel M, Prettenhofer P et al.  
551 (2011) Scikit-learn: Machine Learning in Python *J Mach Learn Res* 12:2825-2830
- 552 Perez-Iratxeta C, Bork P, Andrade MA (2002) Association of genes to genetically inherited diseases using  
553 data mining *Nat Genet* 31:316 doi:10.1038/ng895
- 554 Pollard KS, Hubisz MJ, Rosenbloom KR, Siepel A (2010) Detection of nonneutral substitution rates on  
555 mammalian phylogenies *Genome Res* 20:110-121 doi:10.1101/gr.097857.109
- 556 Price AL, Zaitlen NA, Reich D, Patterson N (2010) New approaches to population stratification in genome-  
557 wide association studies *Nat Rev Genet* 11:459-463 doi:10.1038/nrg2813
- 558 Ritchie GR, Dunham I, Zeggini E, Flicek P (2014) Functional annotation of noncoding sequence variants  
559 *Nat Methods* 11:294-296 doi:10.1038/nmeth.2832
- 560 Schaefer R, Michno J-M, Jeffers J, Hoekenga OA, Dilkes BP, Baxter IR, Myers C (2018) Integrating co-  
561 expression networks with GWAS to prioritize causal genes in maize *Plant Cell*  
562 doi:10.1105/tpc.18.00299
- 563 Schlapfer P, Zhang P, Wang C, Kim T, Banf M, Chae L, Dreher K, Chavali AK et al. (2017) Genome-  
564 Wide Prediction of Metabolic Enzymes, Pathways, and Gene Clusters in Plants *Plant Physiol*  
565 173:2041-2059 doi:10.1104/pp.16.01942
- 566 Takahashi R, Bashir K, Ishimaru Y, Nishizawa NK, Nakanishi H (2012) The role of heavy-metal ATPases,  
567 HMAs, in zinc and cadmium transport in rice *Plant Signal Behav* 7:1605-1607  
568 doi:10.4161/psb.22454
- 569 Tin Kam H (1998) The random subspace method for constructing decision forests *IEEE Transactions on*  
570 *Pattern Analysis and Machine Intelligence* 20:832-844 doi:10.1109/34.709601
- 571 Touw WG, Bayjanov JR, Overmars L, Backus L, Boekhorst J, Wels M, van Hijum SA (2013) Data mining  
572 in the Life Sciences with Random Forest: a walk in the park or lost in the jungle? *Brief Bioinform*  
573 14:315-326 doi:10.1093/bib/bbs034
- 574 Tuinstra MR, Ejeta G, Goldsbrough PB (1997) Heterogeneous inbred family (HIF) analysis: a method for  
575 developing near-isogenic lines that differ at quantitative trait loci *Theor Appl Genet* 95:1005-1011  
576 doi:10.1007/s001220050654
- 577 Turner TL, Bourne EC, Von Wettberg EJ, Hu TT, Nuzhdin SV (2010) Population resequencing reveals  
578 local adaptation of *Arabidopsis lyrata* to serpentine soils *Nat Genet* 42:260-263  
579 doi:10.1038/ng.515
- 580 Van de Velde J, Heyndrickx KS, Vandepoele K (2014) Inference of Transcriptional Networks in  
581 *Arabidopsis* through Conserved Noncoding Sequence Analysis *Plant Cell* 26:2729-2745  
582 doi:10.1105/tpc.114.127001
- 583 Weirauch MT, Yang A, Albu M, Cote AG, Montenegro-Montero A, Drewe P, Najafabadi HS, Lambert SA  
584 et al. (2014) Determination and Inference of Eukaryotic Transcription Factor Sequence Specificity  
585 *Cell* 158:1431-1443 doi:10.1016/j.cell.2014.08.009
- 586 Wellenreuther M, Hansson B (2016) Detecting Polygenic Evolution: Problems, Pitfalls, and Promises  
587 *Trends Genet* 32:155-164 doi:10.1016/j.tig.2015.12.004

- 588 Xu S (2003) Theoretical basis of the Beavis effect *Genetics* 165:2259-2268
- 589 Yang HY, You AQ, Yang ZF, Zhang F, He RF, Zhu LL, He G (2004) High-resolution genetic mapping at  
590 the Bph15 locus for brown planthopper resistance in rice (*Oryza sativa* L.) *Theor Appl Genet*  
591 110:182-191 doi:10.1007/s00122-004-1844-0
- 592 Yin ZG, Qi HD, Chen QS, Zhang ZG, Jiang HW, Zhu RS, Hu ZB, Wu XX et al. (2017) Soybean plant  
593 height QTL mapping and meta-analysis for mining candidate genes *Plant Breed* 136:688-698  
594 doi:10.1111/pbr.12500
- 595 Zhang H (2004) The Optimality of Naive Bayes Proc FLAIRS  
596  
597

598

599 **Figure Captions**

600 **Fig. 1** Model training and optimization based on cross-validation. (a) model training and cross-validation  
601 framework. We randomly selected negatives from the genome and iterated to maximize the combinations  
602 of training and testing data. (b) The ROC curve of Arabidopsis and rice models after parameter  
603 optimization. True and false positive rates were based on the average of all iterations. The grey diagonal  
604 line indicates the expected performance based on random guessing. The number in parentheses indicates  
605 Area Under the ROC Curve (AUC-ROC)

606 **Fig. 2** Important features of causal genes and their enrichment or depletion relative to the genome  
607 background (a) Feature importance as indicated by the change of AUC-ROC ( $\Delta$ AUC-ROC) when  
608 excluding each feature. The  $\Delta$ AUC-ROC indicates the average value of all iterations. Error bars indicate  
609 standard deviation. The features with a name that starts with “is\_” are binary variables. (b) The enrichment  
610 or depletion of the top 6 features in Arabidopsis and rice models. The enrichment/depletion were indicated  
611 by the ratio of causal genes to genome background. ns, not shown because the feature is not one of the top  
612 6 features in that species

613 **Fig. 3** Model performance at different thresholds (a) Percentage of correctly prioritized causal genes of a  
614 single QTL at different rank thresholds. Dashed lines indicate the background of random selections. (b-c)  
615 The probability of correctly prioritizing at least X% of causal genes when analyzing multiple QTLs  
616 simultaneously

617 **Fig. 4** (a) Trait categories of known causal genes from the training set. (b) The rank percentile of causal  
618 genes of different trait categories. Each causal gene and 200 neighboring genes were used as testing set  
619 once. All other known causal genes were used as training set. Each dot indicates a known causal gene. The  
620 grey dashed line indicates 20% rank percentile. The trait categories of causal genes are defined in Tables  
621 S1 and S2  
622

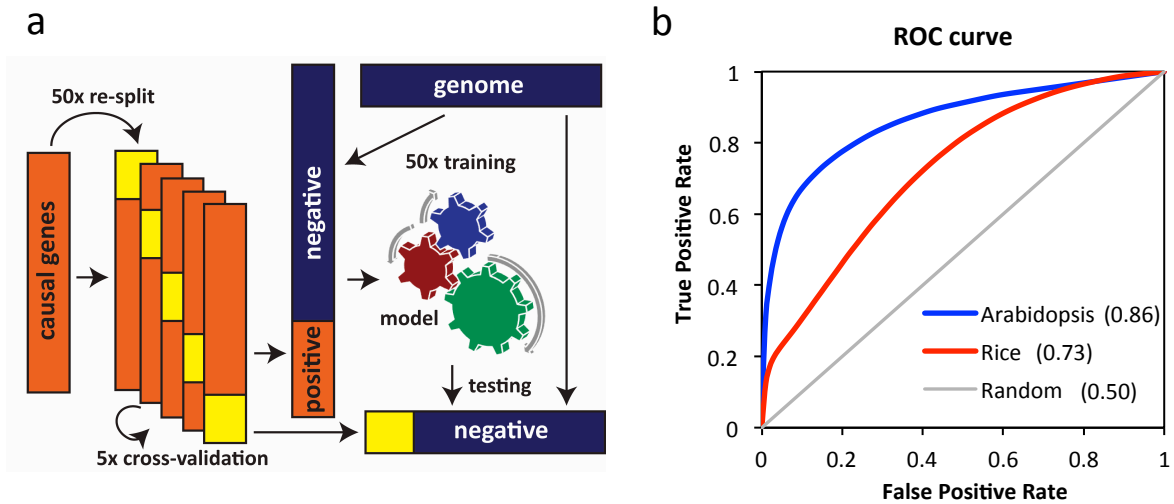

**Fig. 1** Model training and optimization based on cross-validation. (a) model training and cross-validation framework. We randomly selected negatives from the genome and iterated to maximize the combinations of training and testing data. (b) The ROC curve of Arabidopsis and rice models after parameter optimization. True and false positive rates were based on the average of all iterations. The grey diagonal line indicates the expected performance based on random guessing. The number in parentheses indicates Area Under the ROC Curve (AUC-ROC)

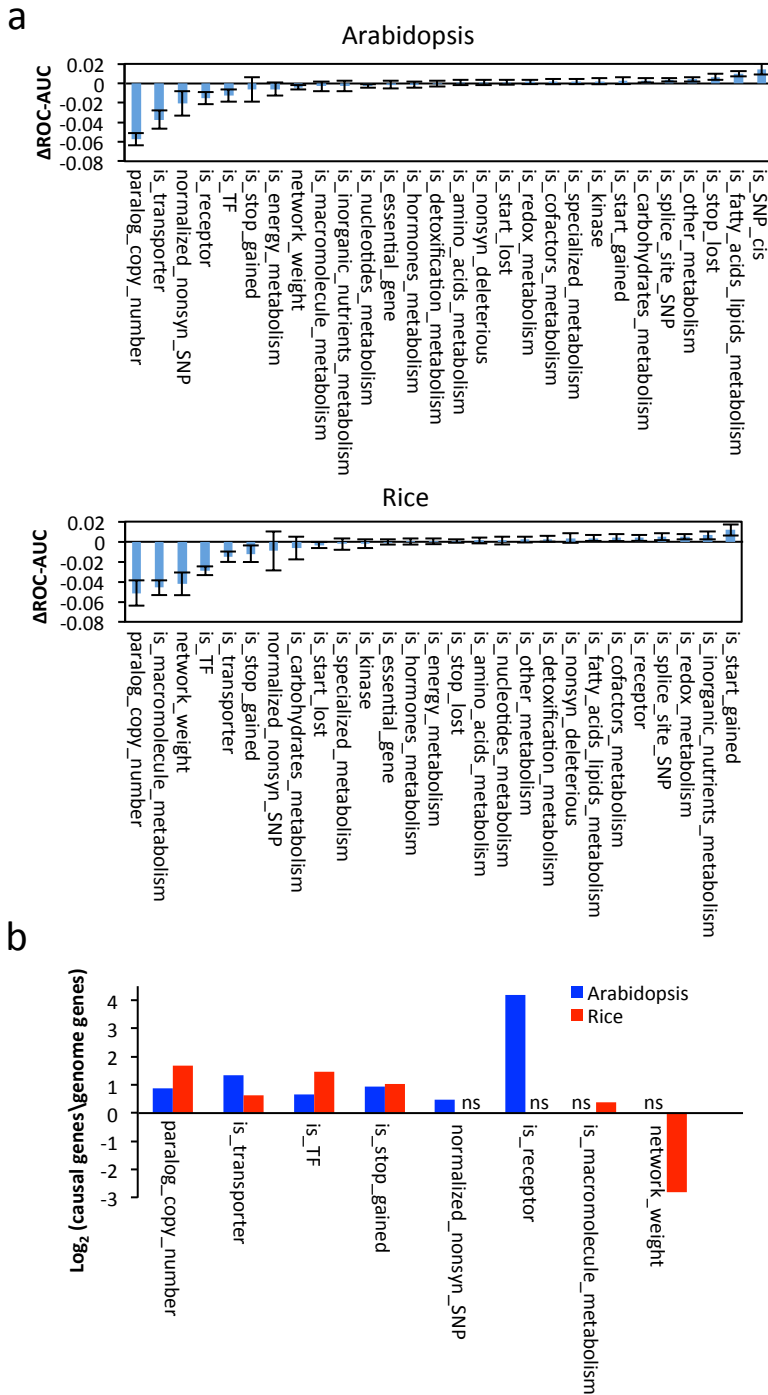

**Fig. 2** Important features of causal genes and their enrichment or depletion relative to the genome background (a) Feature importance as indicated by the change of AUC-ROC ( $\Delta$ AUC-ROC) when excluding each feature. The  $\Delta$ AUC-ROC indicates the average value of all iterations. Error bars indicate standard deviation. The features with a name that starts with “is\_” are binary variables. (b) The enrichment or depletion of the top 6 features in Arabidopsis and rice models. The enrichment/depletion were indicated by the ratio of causal genes to genome background. ns, not shown because the feature is not one of the top 6 features in that species

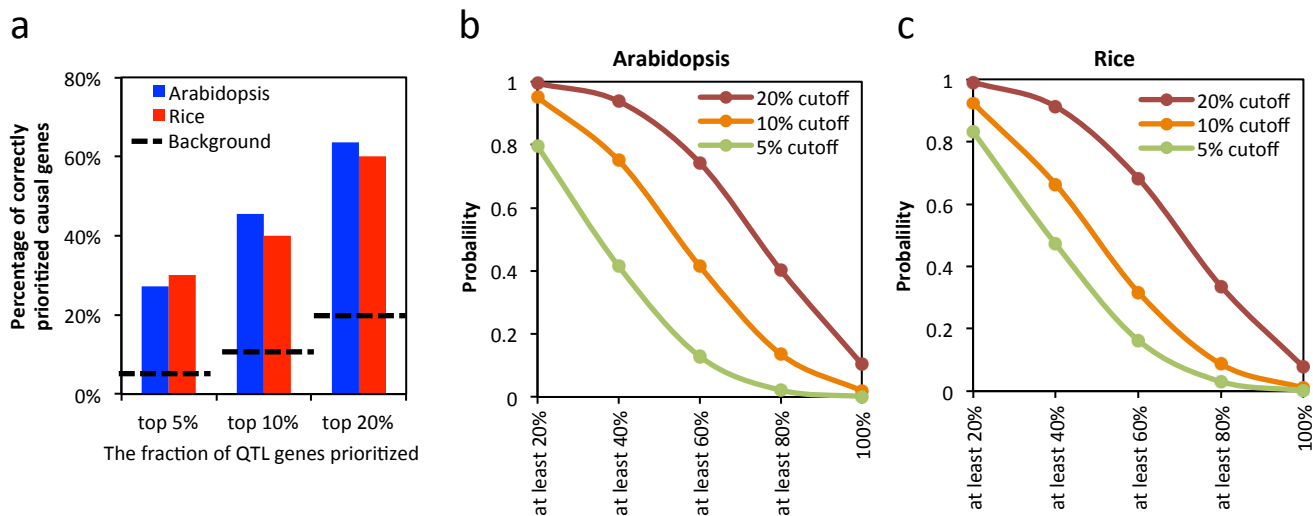

**Fig. 3** Model performance at different thresholds (a) Percentage of correctly prioritized causal genes of a single QTL at different rank thresholds. Dashed lines indicate the background of random selections. (b-c) The probability of correctly prioritizing at least X% of causal genes when analyzing multiple QTLs simultaneously

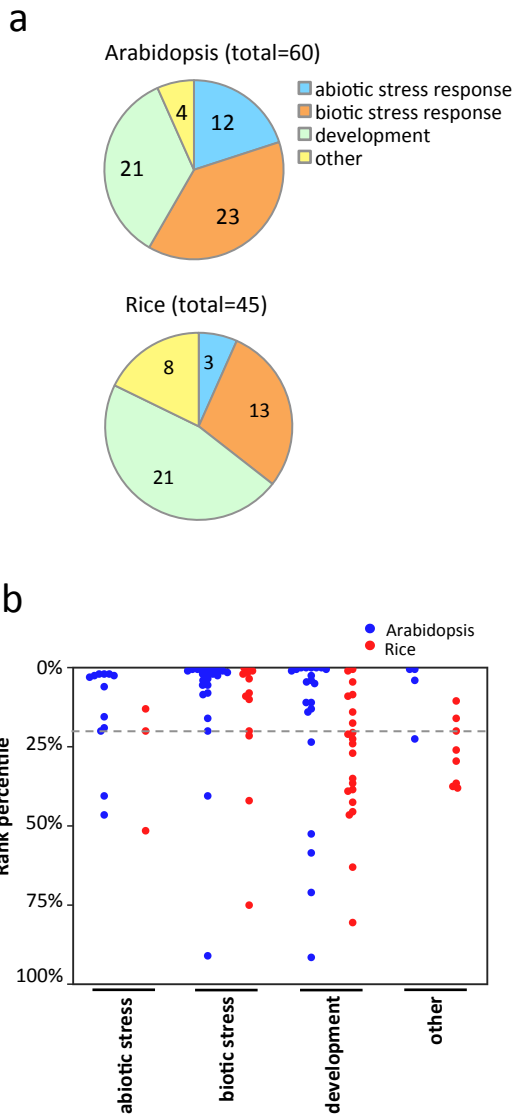

**Fig. 4** (a) Trait categories of known causal genes from the training set. (b) The rank percentile of causal genes of different trait categories. Each causal gene and 200 neighboring genes were used as testing set once. All other known causal genes were used as training set. Each dot indicates a known causal gene. The grey dashed line indicates 20% rank percentile. The trait categories of causal genes are defined in Tables S1 and S2
